# Supplementary material
Source: PubMed Central journal article supplement (PMC7895461)

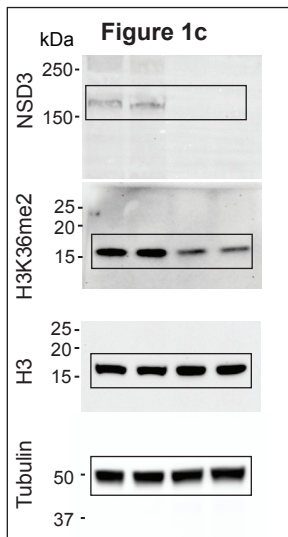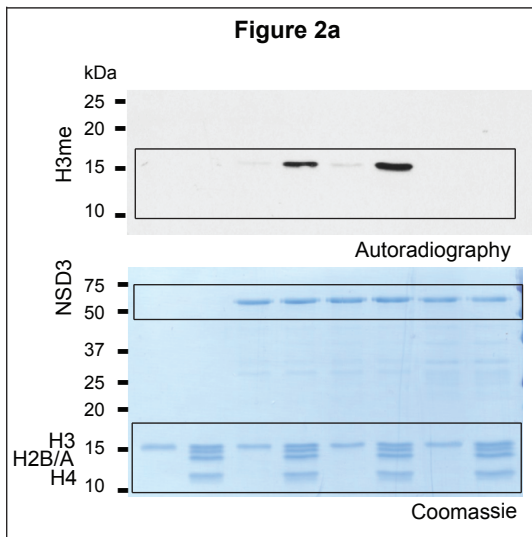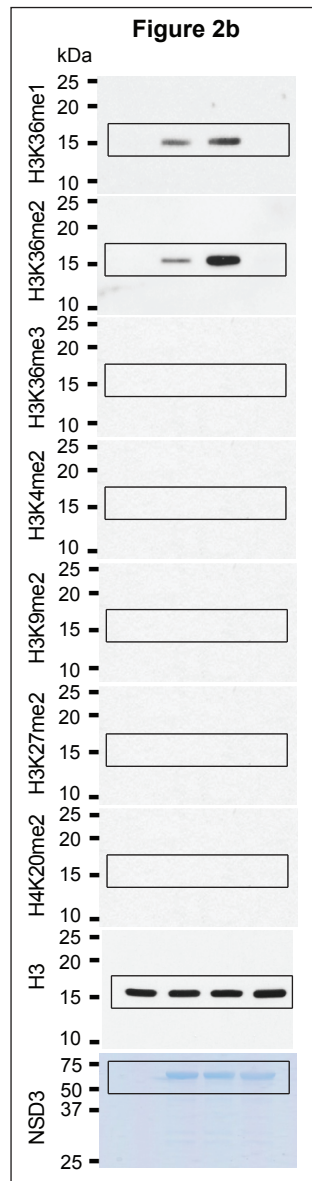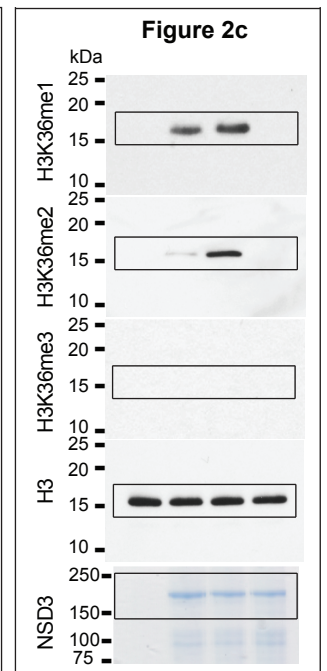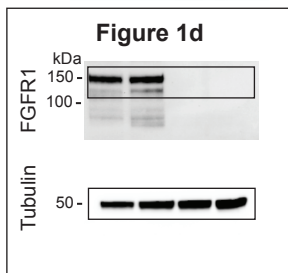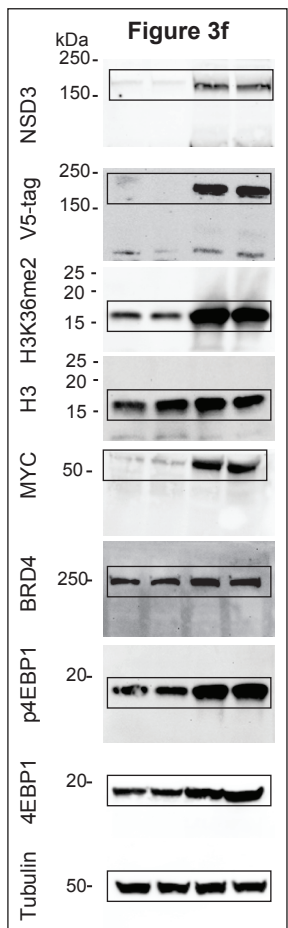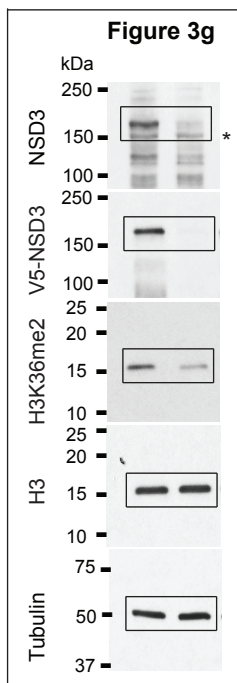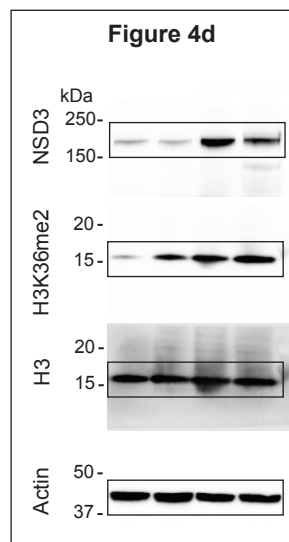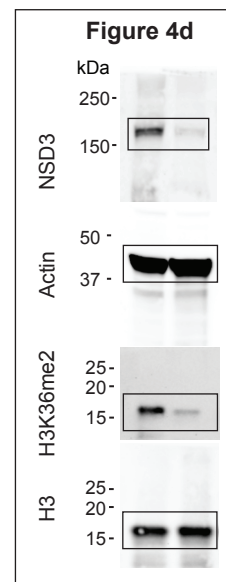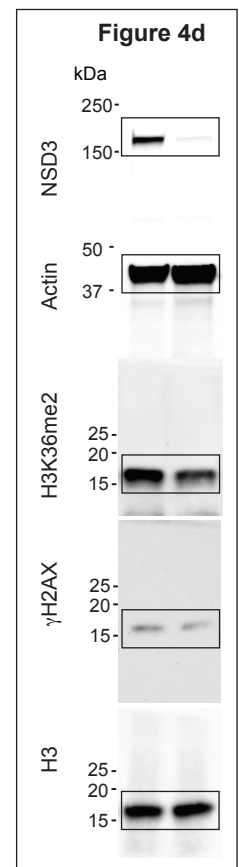

**Extended figure 2a**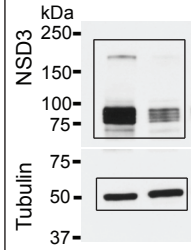**Extended figure 2b**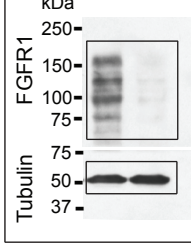**Extended figure 2d**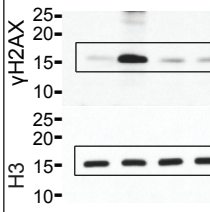**Extended figure 3b**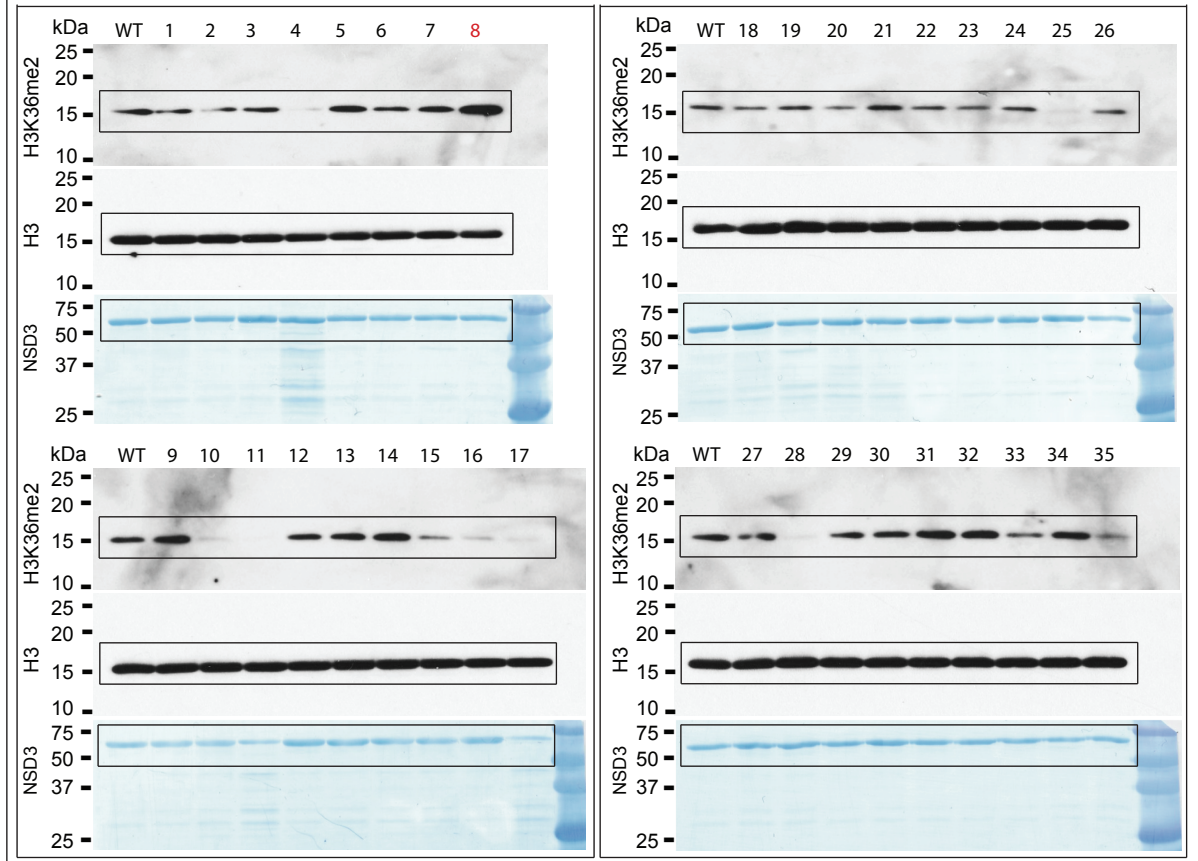**Extended figure 3e**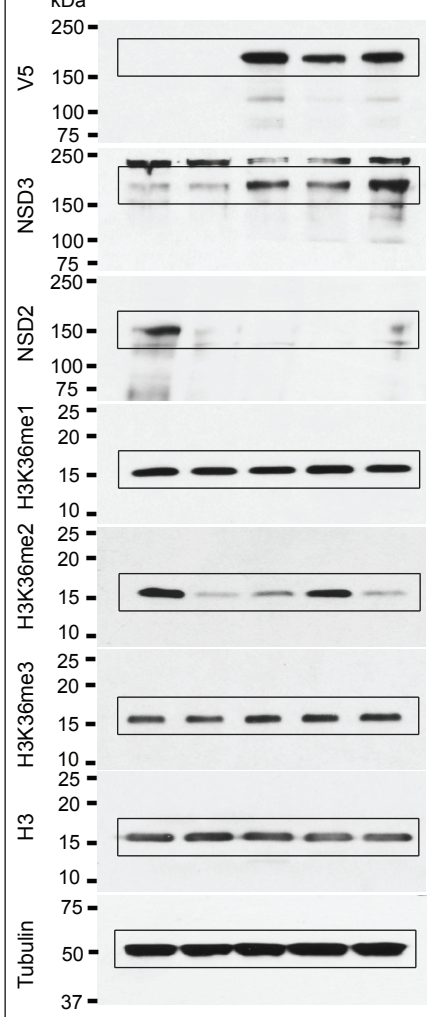**Extended figure 3f**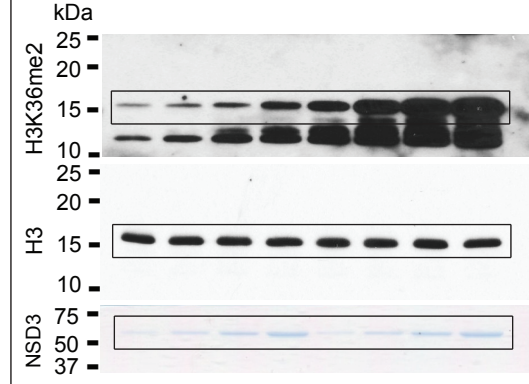**Extended Data Figure 4i**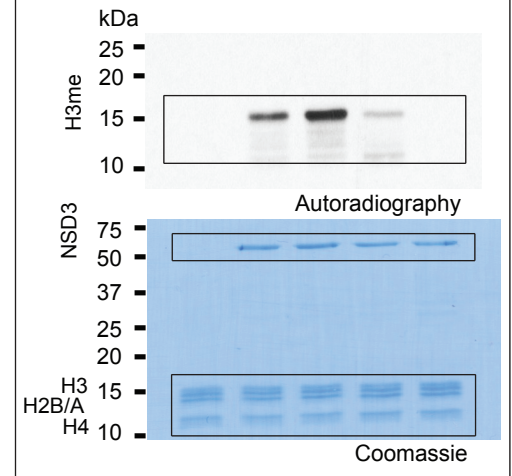

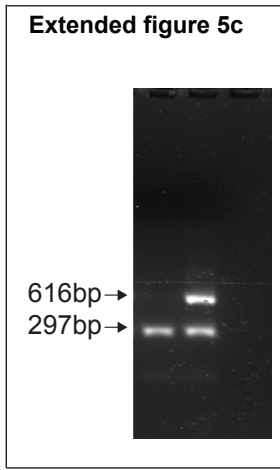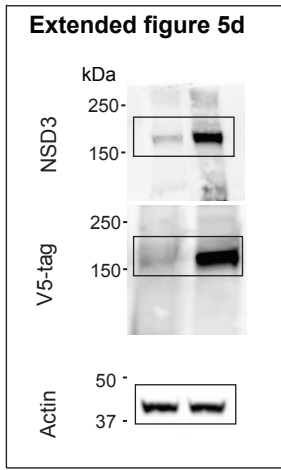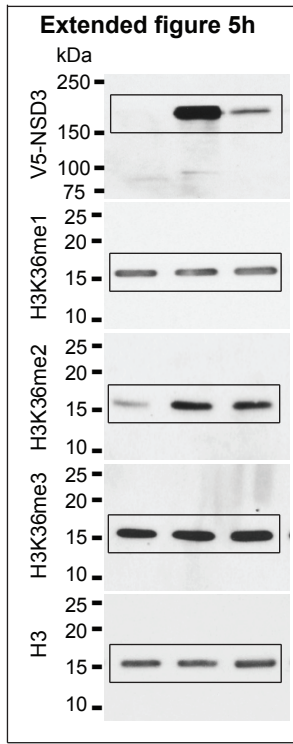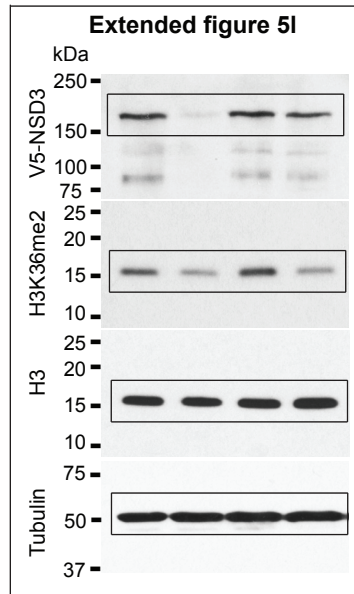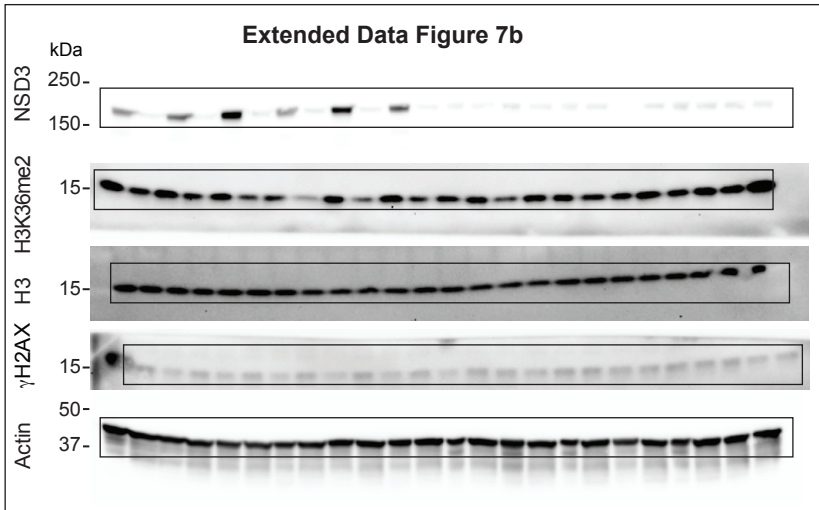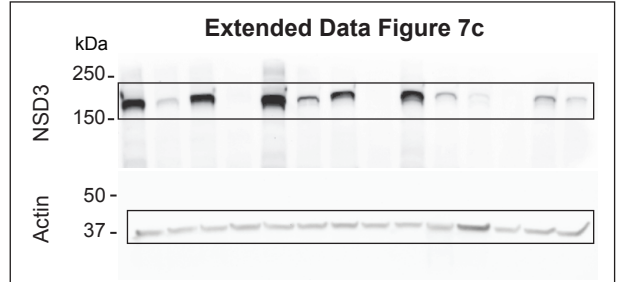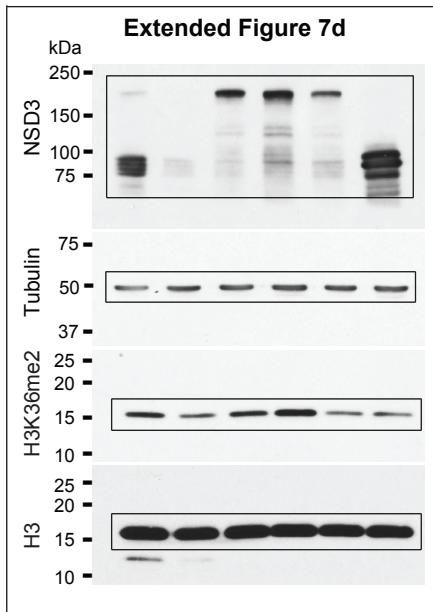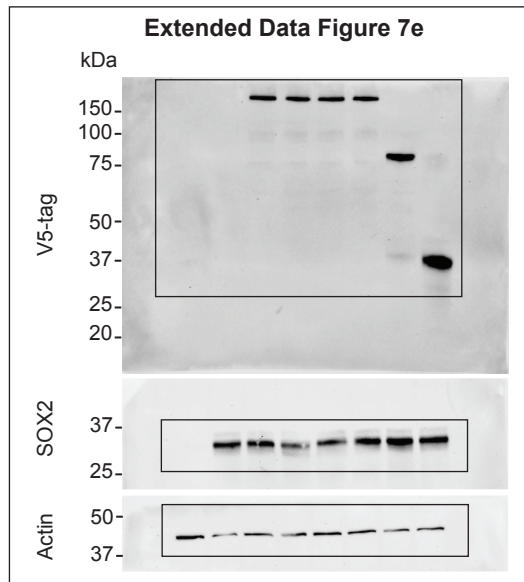

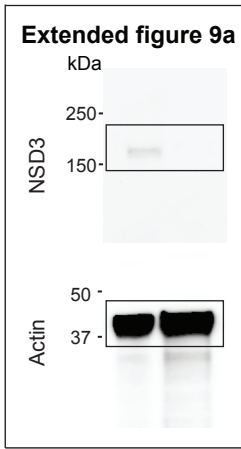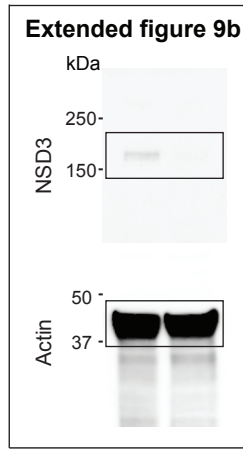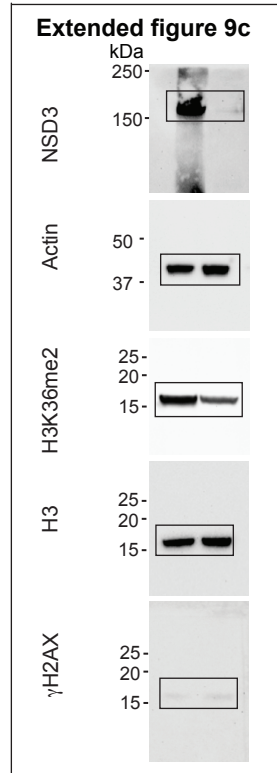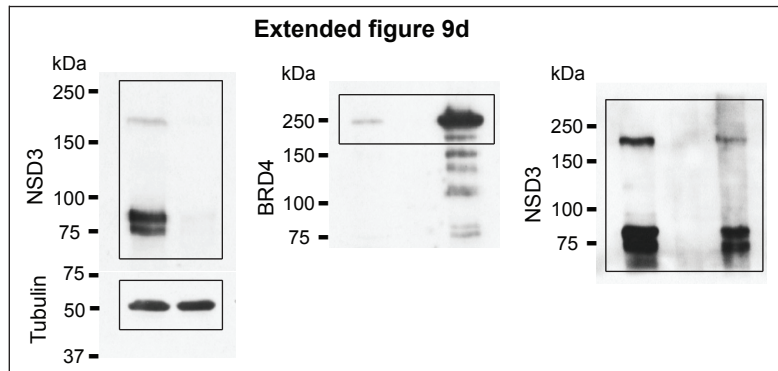

Supplement: NIHMS1657561-supplement-2.pdf [file NIHMS1657561-supplement-2.pdf]
